# Supplementary material for: Thrombin immobilized polydopamine–diatom biosilica for effective hemorrhage control
Source: Royal Society of Chemistry journal article supplement (doi:10.1039/d0bm02116d), 2021-01-01
Supplement: d0bm02116d4.pdf [file d0bm02116d4.pdf]

## Supporting information

### **Thrombin Immobilized Polydopamine-Diatom Biosilica for Effective Hemorrhage Control**

Yuzhi Mu<sup>a</sup>, Yangmu Fu<sup>b</sup>, Jing Li<sup>a</sup>, Kai Shao<sup>d</sup>, Jianhui Pang<sup>a</sup>, Chang Su<sup>a</sup>, Yibo Cai<sup>b</sup>, Xiaojie Sun<sup>a</sup>, Xin Cong<sup>a</sup>, Xiguang Chen<sup>a,c</sup>, and Chao Feng<sup>\*a</sup>

- a. College of Marine Life Science, Ocean University of China, 5# Yushan Road, Qingdao 266003, Shandong Province, China.
- b. Department of Orthopaedics, Hainan Hospital of Chinese PLA General Hospital. Jianglin Road, Sanya 572013, P. R. China.
- c. Qingdao national laboratory for marine science and technology, 1# Wenhai Road, Qingdao 266000, Shandong Province, China.
- d. Department of Central Laboratory, Qilu Hospital (Qingdao), Cheeloo College of Medicine, Shandong University, 758# Hefei Road, Qingdao 266035, Shandong Province, China

## Fibrinogen activation in Platelet-poor plasma.

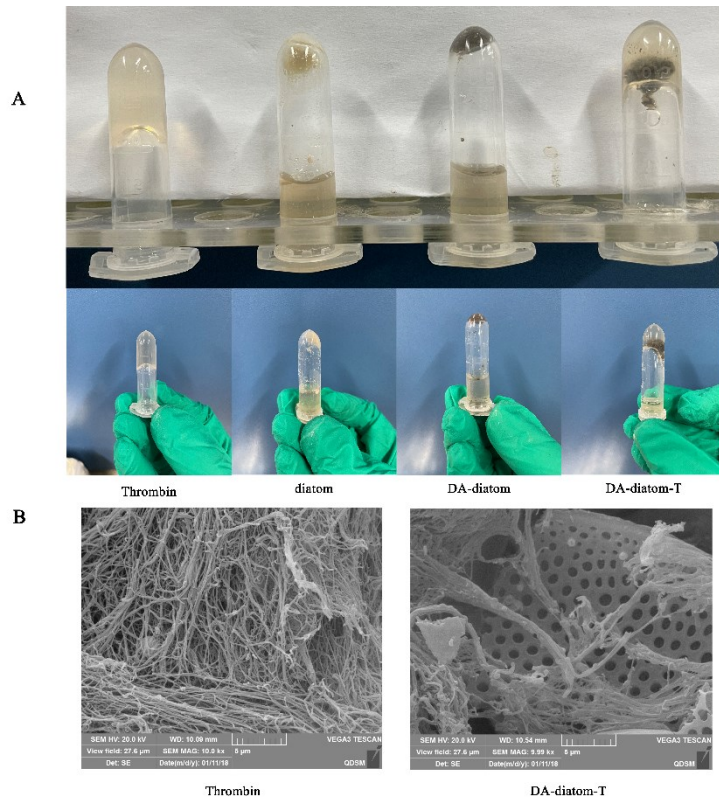

**Figure S1.** (A) The photo of diatom, DA5-diatom, DA5-diatom-T and thrombin after mixed with Platelet-poor plasma. (B) The SEM images of DA5-diatom-T and thrombin after mixed with fibrinogen solution.

## Plasma viscosity test

DA-diatom-T, DA-diatom and diatom (5 mg/mL) were mixed with Rabbit platelet-poor plasma (containing sodium citrate anticoagulant). To evaluate the plasma viscosity,, the viscometry, modes of a rheometer (Discovery Hybrid Rheometer HR 10, TA Instruments, Ltd.) was applied. A cone plate 2°/40 mm was used for conducting the rheological tests at a shear rate of  $0.01 \text{ s}^{-1}$ , and the gap was set to  $100 \mu \text{ m}$ . Plasma without material was used as a control group.

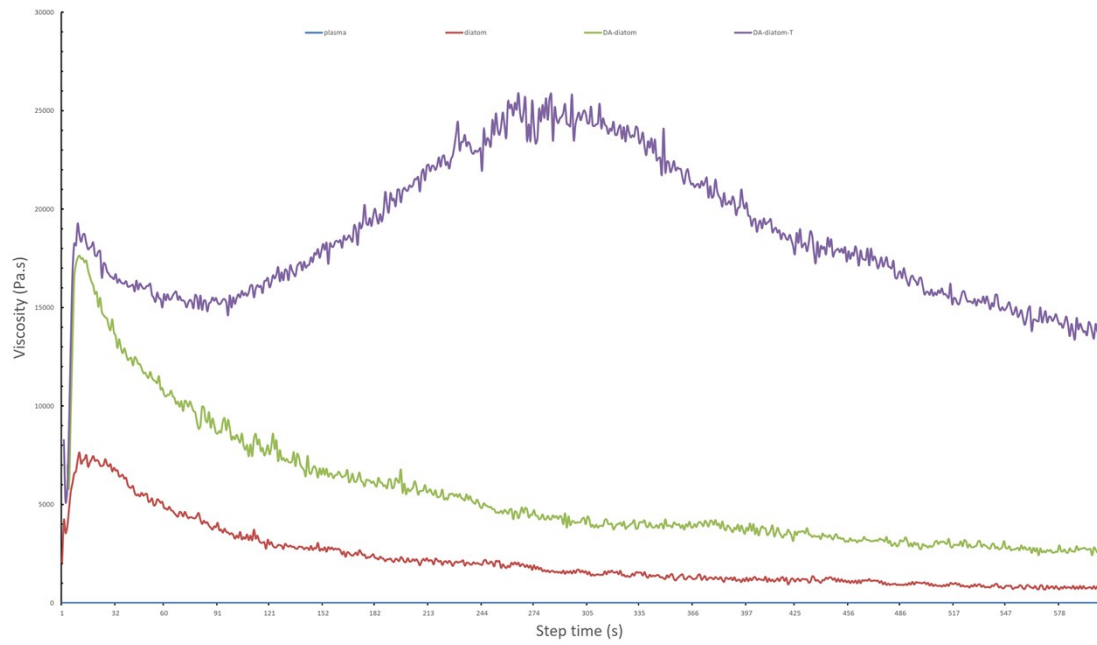

**Figure S2.** The viscosity of plasma after mixed with diatom, DA-diatom or DA-diatom-T.
