# Supplementary figures and images for: Thrombin immobilized polydopamine–diatom biosilica for effective hemorrhage control
Source: Royal Society of Chemistry journal article supplement (doi:10.1039/d0bm02116d), 2021-01-01

A

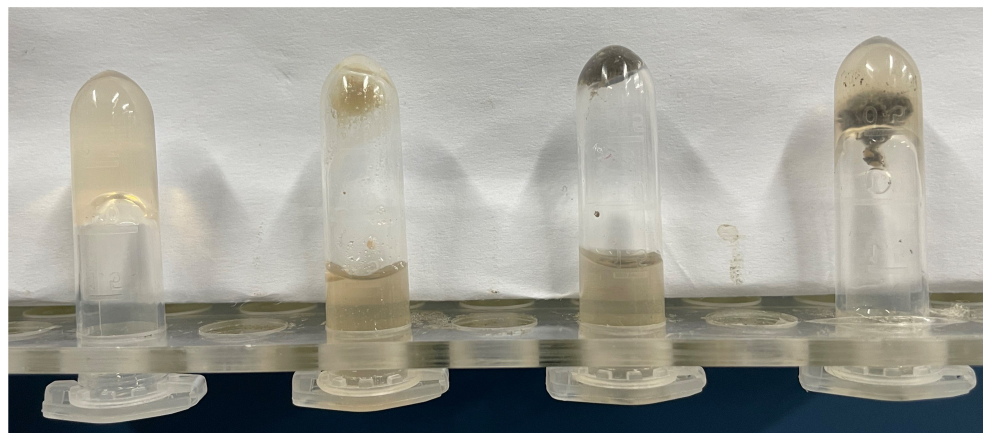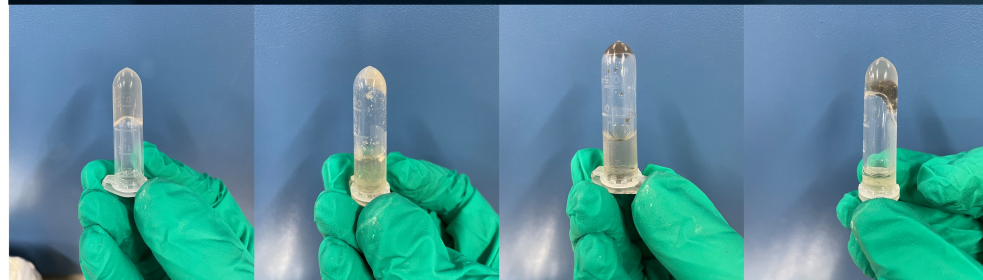

Thrombin

diatom

DA-diatom

DA-diatom-T

B

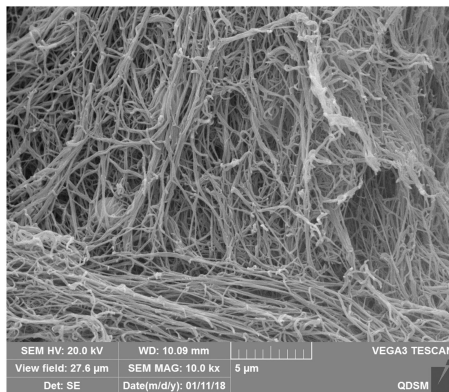

Thrombin

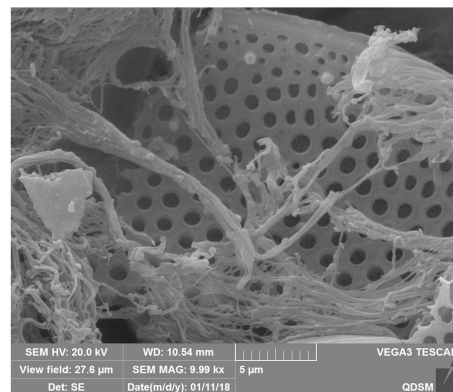

DA-diatom-T

Supplement: d0bm02116d2.pdf [file d0bm02116d2.pdf]

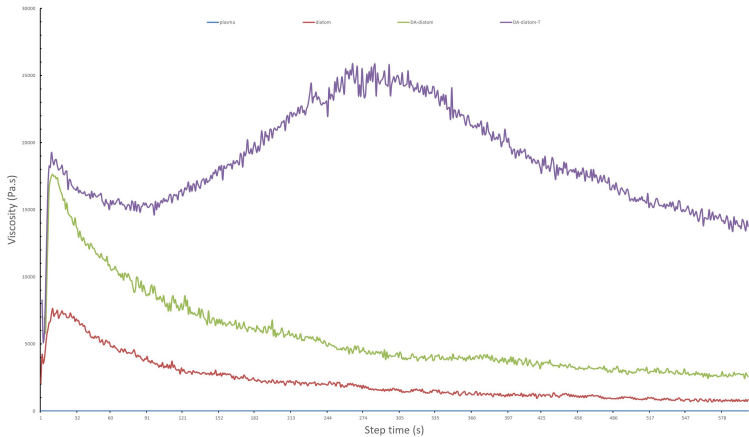

Supplement: d0bm02116d3.pdf [file d0bm02116d3.pdf]
